# Supplementary material for: ISOM 1.0: a fully mesoscale-resolving idealized Southern Ocean model and the diversity of multiscale eddy interactions
Source: Copernicus journal article supplement (doi:10.5194/gmd-17-8469-2024), 2024-11-28
Supplement: Supplementary file 1 [file gmd-17-8469-2024-supplement.pdf]

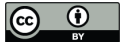

*Supplement of*

## **ISOM 1.0: a fully mesoscale-resolving idealized Southern Ocean model and the diversity of multiscale eddy interactions**

**Jingwei Xie et al.**

*Correspondence to:* Jingwei Xie (xiejw23@mail3.sysu.edu.cn) and Hailong Liu (hlliu2@qnlm.ac)

The copyright of individual parts of the supplement might differ from the article licence.

This document provides supplementary materials for two versions of the idealized southern ocean model. The current version refers to the model presented in the main text of the GMD manuscript submitted in August 2024. The early version refers to the model we initially submitted to GMD in April 2024. The current version has undergone significant optimizations based on feedback from reviewers and our accumulated simulation experience. These optimizations include the following:

- 5 (1) Expanding the computational domain from 14400 km x 2400 km to 18000 km x 3000 km.
- (2) Increasing the bottom depth from 3000 m to 4000 m.
- (3) Optimizing the design of iconic topography, including setting the shallowest depth in the Drake Passage to 2,500 m and optimizing its internal slopes, introducing asymmetry on the African continent, adding a mid-ocean ridge on the eastern side of the African continent, optimizing the settings of ridges, and Optimizing the relative position of the topographic features.
- 10 (4) Adding the KPP scheme to enhance the realism of simulated mixed layer.

Figs. S1 and S2 for the current ISOM. Figs. S3-S8 for the early design. Fig. S9 show the potential enstrophy conversion between the large-scale and eddy components of the flow in the current version of ISOM. Tables S1 and S2 for the configuration of the early design.

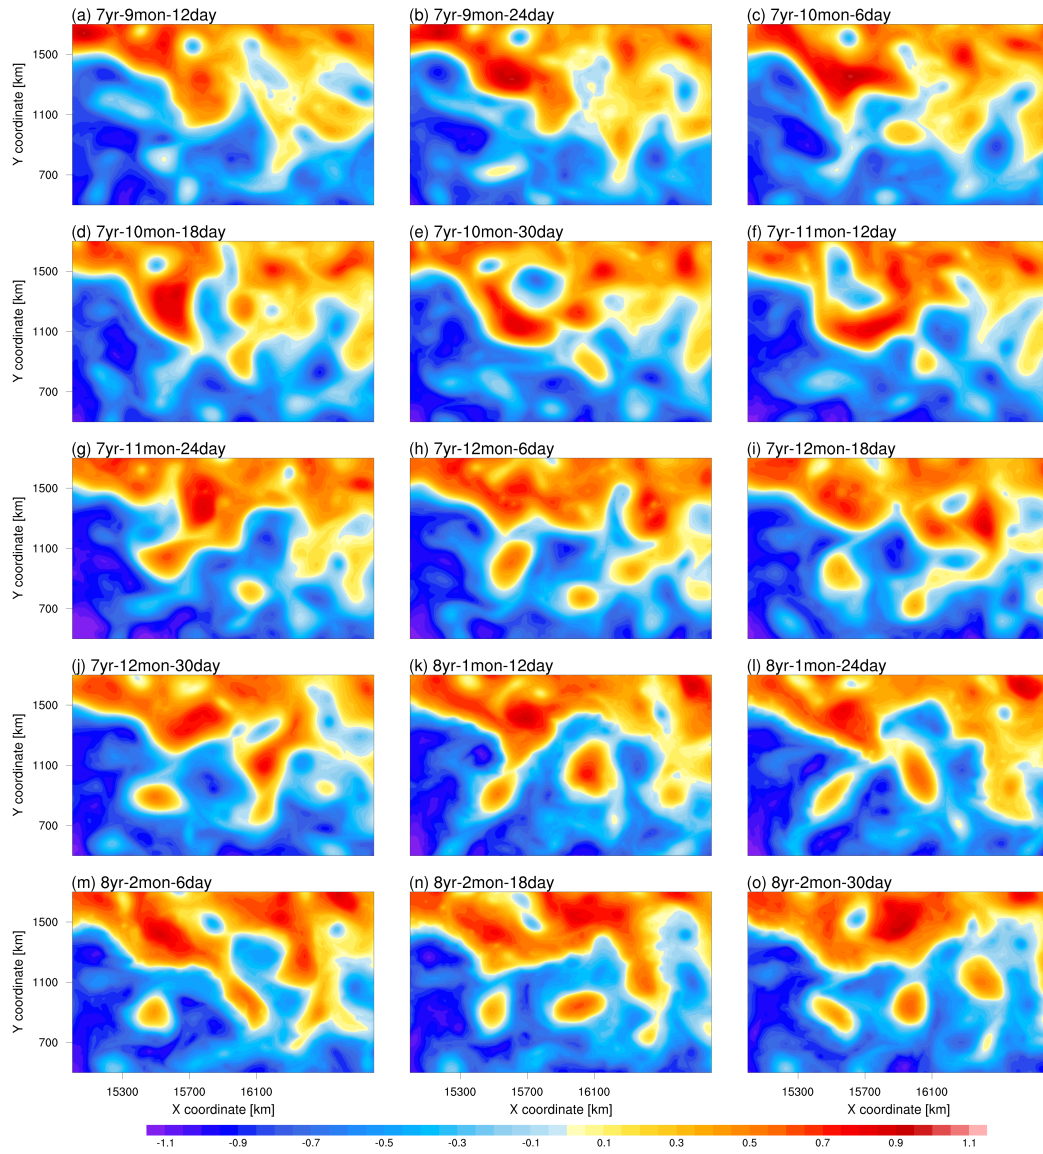

**Figure S1.** The evolution of sea surface height for six model months of the 2-km simulation. The stationary eddy can exist for more than three months. The jet may borrow the eddy circulation during the eddy's lifespan.

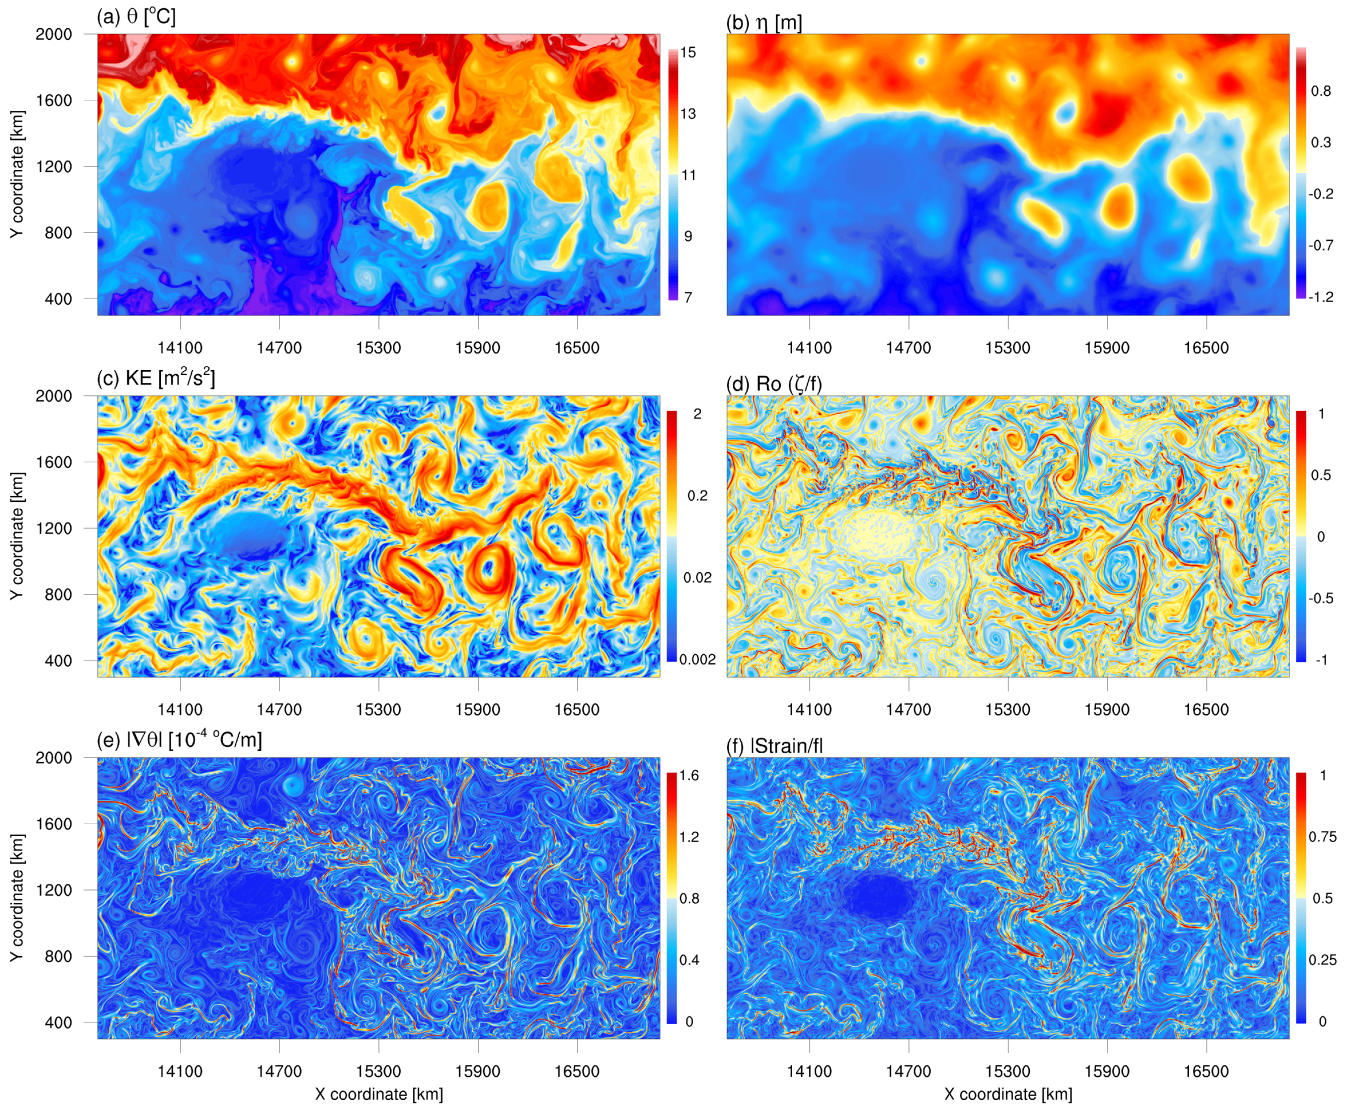

**Figure S2.** Same as Fig. 7 in the main text but for Surface snapshot of day 60 in the 8th model year of the 2-km simulation in the Gaussian plateau region. (a) Potential temperature, (b) sea surface height, (c) kinetic energy, (d) Rossby number (normalized relative vorticity), (e) the magnitude of the horizontal temperature gradient, and (f) normalized strain rate.

**Table S1.** Basic parameters of the early ISOM design.

| Symbol          | Value                                           | Description                                                          |
|-----------------|-------------------------------------------------|----------------------------------------------------------------------|
| $L_x, L_y$      | 14400 km, 2400 km                               | Domain size                                                          |
| $H$             | 3000 m                                          | Domain depth                                                         |
| $\Delta z$      | 5 - 200 m                                       | Vertical grid spacing                                                |
| $L_{sponge}$    | 240 km                                          | Sponge layer size                                                    |
| $\tau_{sponge}$ | 7 days                                          | Shortest Sponge layer relaxation timescale                           |
| $\lambda$       | 30 days                                         | Surface temperature relaxation time scale (outside the sponge layer) |
| $f_0$           | $-1 \times 10^{-4} \text{s}^{-1}$               | Reference Coriolis parameter                                         |
| $\beta$         | $1 \times 10^{-11} \text{m}^{-1} \text{s}^{-1}$ | Meridional gradient of Coriolis parameter                            |
| $g$             | $9.81 \text{m s}^{-2}$                          | Gravitational acceleration                                           |
| $\tau_0$        | $0.2 \text{N m}^{-2}$                           | Wind stress magnitude                                                |
| $C_d$           | $1 \times 10^{-2}$                              | Quadratic bottom drag parameter                                      |
| $\rho_c$        | $1035 \text{kg m}^{-3}$                         | Reference density                                                    |
| $\alpha$        | $2 \times 10^{-4} \text{K}^{-1}$                | Linear thermal expansion coefficient                                 |
| $\kappa_v$      | $5 \times 10^{-6} \text{m s}^{-2}$              | Vertical diffusivity                                                 |
| $\kappa_h$      | 0                                               | Horizontal diffusivity                                               |
| $A_v$           | $3 \times 10^{-4} \text{m s}^{-2}$              | Vertical viscosity                                                   |

**Table S2.** Parameters of the early ISOM simulations with different horizontal resolution at their statistical steady state. DST-33 is 3rd order DST (direct space-time) flux limiter. 7-order is 7th order monotonicity-preserving scheme.

| Symbol               | Value 1         | Value 2         | Value 3            | Description                                              |
|----------------------|-----------------|-----------------|--------------------|----------------------------------------------------------|
| $\Delta x, \Delta y$ | 2 km            | 4 km            | 8 km               | Horizontal grid spacing                                  |
| $A_h$                | 2               | 4               | 50                 | Horizontal viscosity ( $\text{m s}^{-2}$ )               |
| $A_4$                | $1 \times 10^8$ | $5 \times 10^9$ | $1 \times 10^{10}$ | Horizontal hyperviscosity ( $\text{m}^4 \text{s}^{-1}$ ) |
|                      | DST-33          | DST-33          | 7-order            | Advection scheme                                         |
|                      | 33              | 33              | 7                  | MITgcm scheme code                                       |

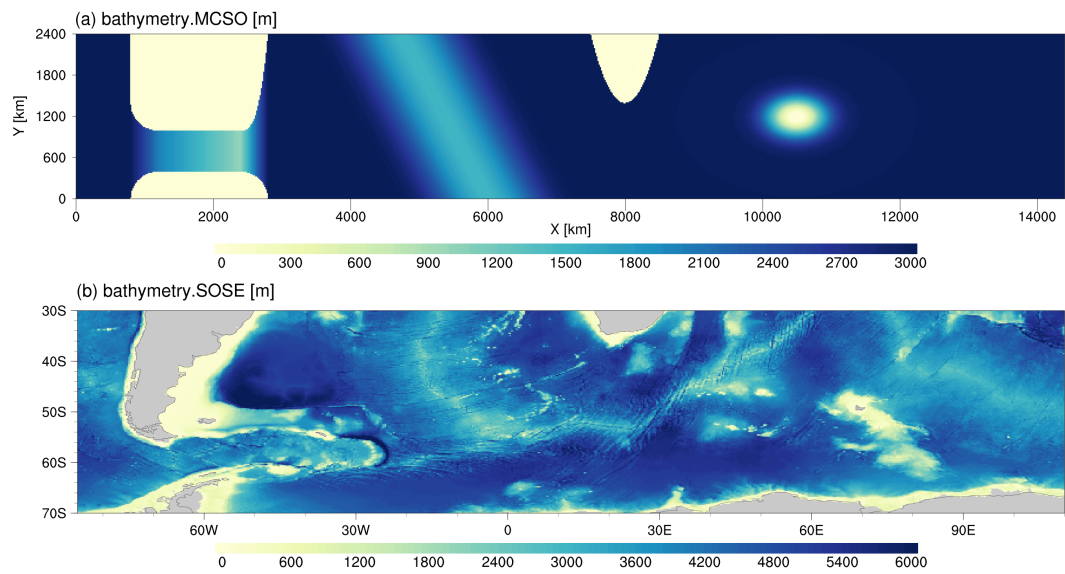

**Figure S3.** The bathymetry of (a) the early version ISOM and (b) Southern Ocean State Estimate (SOSE).

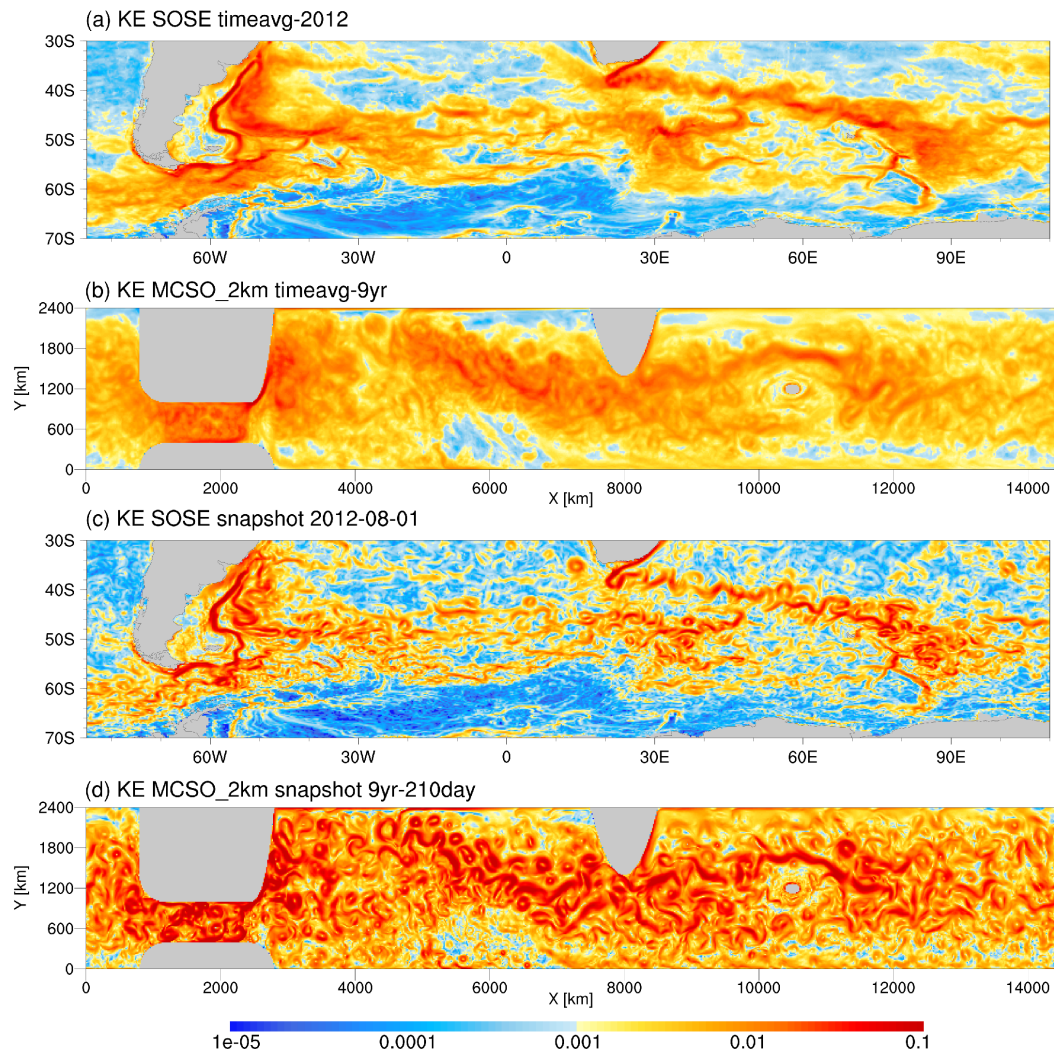

**Figure S4.** (a) The kinetic energy of time-averaged velocity in 2012 of SOSE, (b) the kinetic energy of time-averaged velocity in the 9th model year of the 2-km simulation using the early version of ISOM, and the snapshot of kinetic energy of (c) SOSE and (d) the 2-km simulation.

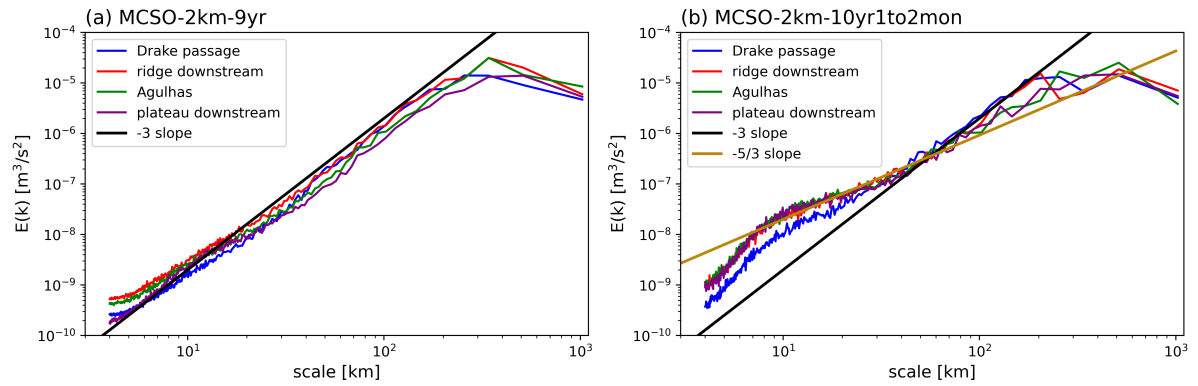

**Figure S5.** The averaged spectral density function of surface EKE of the 2-km simulation using the early version of ISOM. The early design only use the background vertical viscosity and diffusivity and did not use the KPP scheme. The flow in near-surface levels are overly intensified. Though the numerical stability issues did not appear, the intensification might lead to unrealistic submesoscale activities. (a) is from the 3-day-averaged output in the 9th model year, and (b) is from the snapshots in the first two months of the 10th model year. Lines with different colors represent different sampling positions. The eddy velocity is defined as subtracting the time and zonal average of a 1024km zonal segment of meridional velocity in each position.



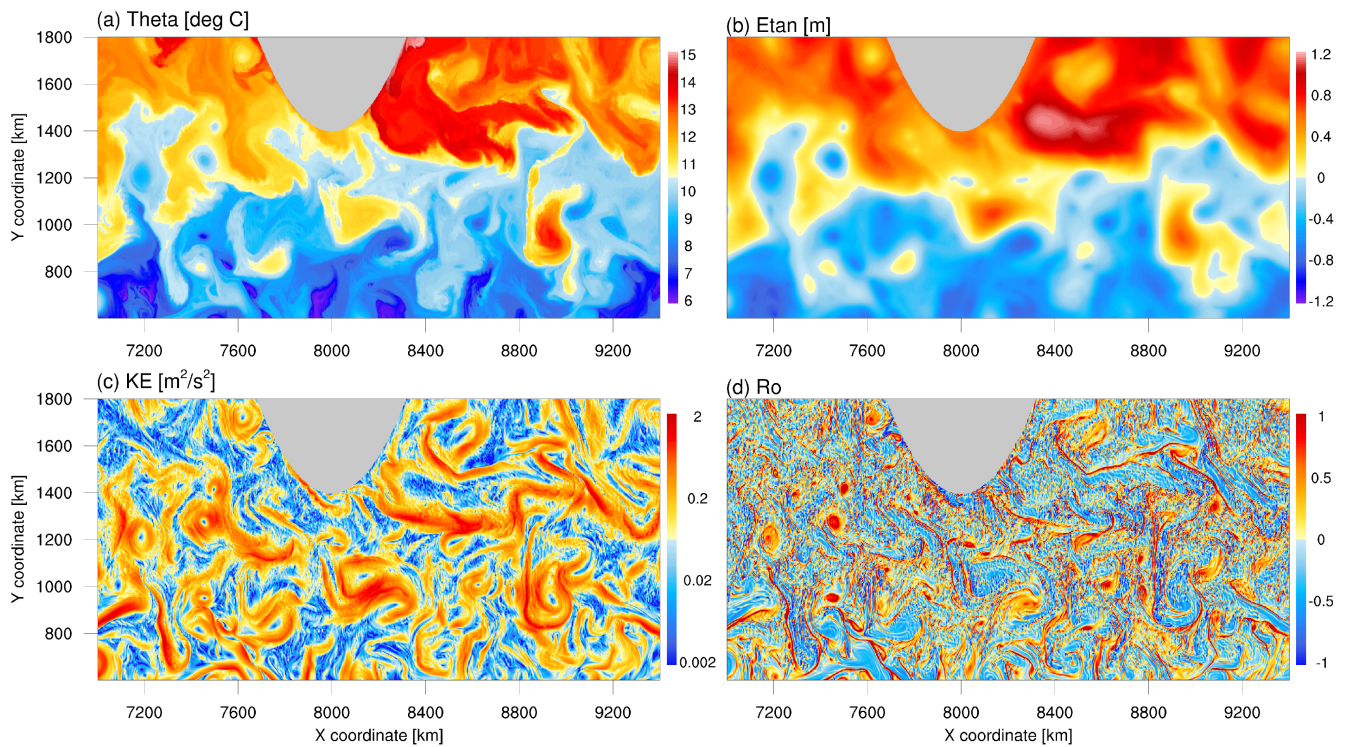

**Figure S6.** Surface snapshot of the 27th model day in the 10th model year of the 2-km simulation in Agulhas area using the early version of ISOM. (a) Potential temperature, (b) the linearized free surface height or sea surface height anomaly, (c) kinetic energy, and (d) Rossby number (defined as relative vorticity divided by local Coriolis parameter).

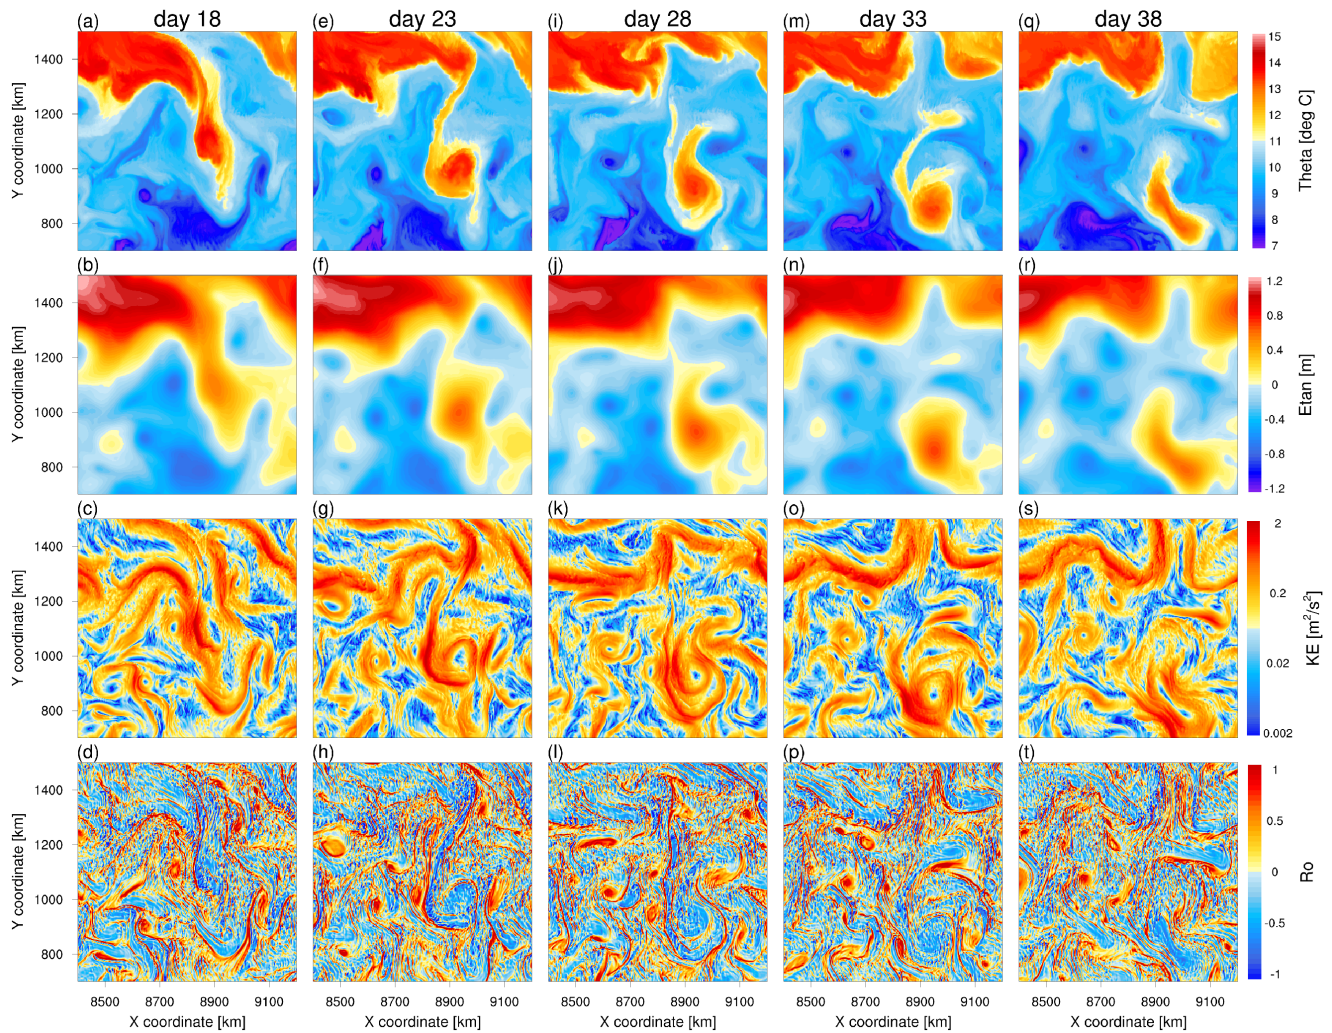

**Figure S7.** An example for warm eddy and meandering jet evolution using the early version of ISOM. From top to bottom are the potential temperature, the linearized free surface height, kinetic energy, and Rossby number.

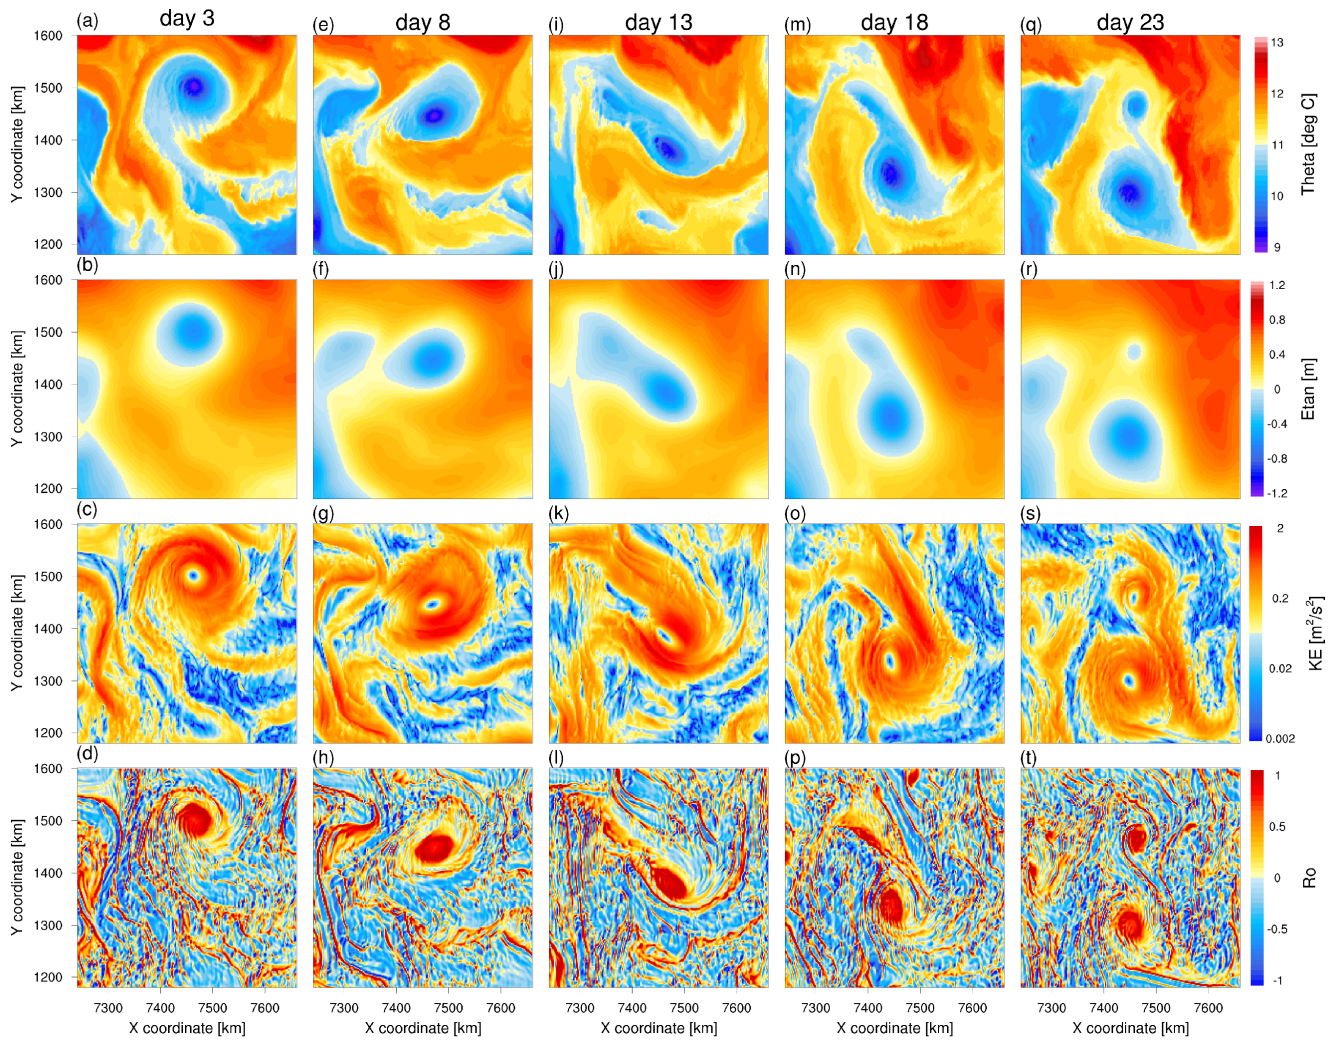

**Figure S8.** Same as Fig. S7 but an example for cold eddy evolution.

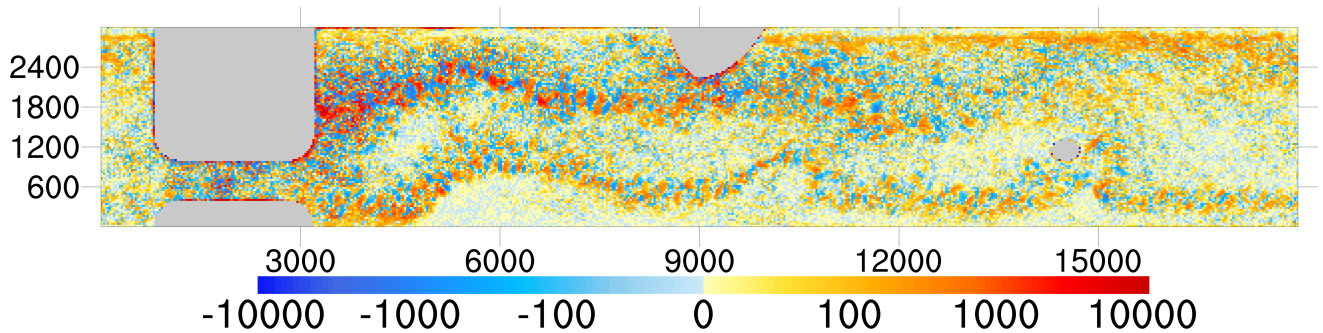

**Figure S9.** The potential enstrophy conversion between the large-scale and eddy components of the flow,  $-\overline{\mathbf{u}'q'} \cdot \nabla \bar{q}$  (unit:  $10^{-30} m^2 s^{-3}$ ).  $\mathbf{u}$  is the velocity. The potential vorticity  $q = \frac{f+\zeta}{\rho} \frac{\partial \rho}{\partial z}$  as Holland et al. (1984). Bar and prime represent the Reynolds' time average and fluctuation, respectively. When the term is positive, there is a conversion of potential enstrophy from the large-scale to the eddying field on average (relevant discussion in Wilson and Williams (2004) or Eaves et al. (2024)). Though the term has spatial variation, the intense forward potential enstrophy transfer towards small scales can happen in regions with active eddy activities. The domain average of the term is also positive, which indicates holistically a forward potential enstrophy cascade in the model. [1] Holland, W., Keffer, T., and Rhines, P. (1984). Dynamics of the oceanic general circulation: the potential vorticity field. *Nature*, 308(5961), 698-705. [2] Wilson and Williams (2004). Why are eddy fluxes of potential vorticity difficult to parameterize? *Journal of physical oceanography*, 34(1), 142-155. [3] Eaves et al. (2024). An energy and enstrophy constrained parameterization of barotropic eddy potential vorticity fluxes. *Authorea Preprints*.
